# Supplementary material
Source: Springer Nature journal article supplement (https://www.springermedizin.de/resource/supplementary/13633_2012_51_MOESM1_ESM.pdf/9595574)
Supplement: MOESM1 [file 9595574]

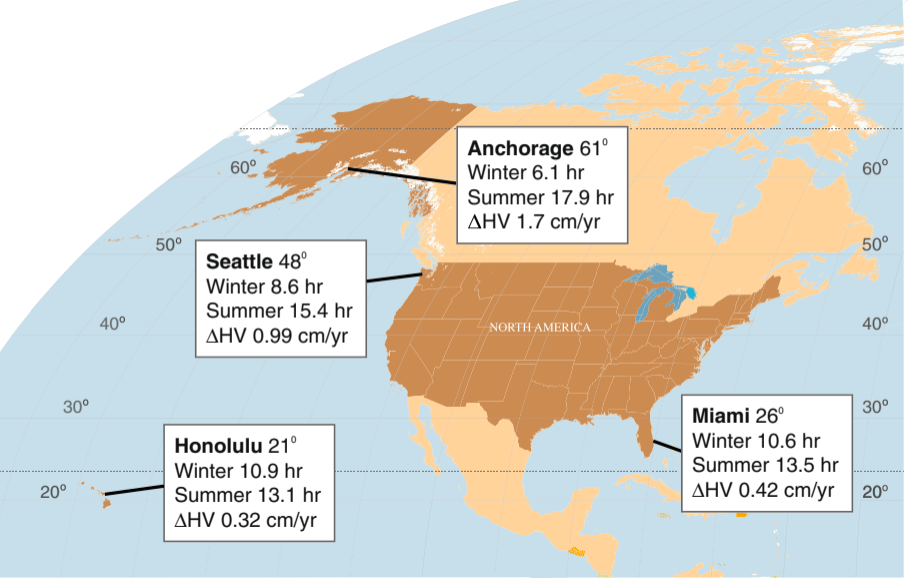

**Anchorage 61°**  
Winter 6.1 hr  
Summer 17.9 hr  
 $\Delta$ HV 1.7 cm/yr

**Seattle 48°**  
Winter 8.6 hr  
Summer 15.4 hr  
 $\Delta$ HV 0.99 cm/yr

**Honolulu 21°**  
Winter 10.9 hr  
Summer 13.1 hr  
 $\Delta$ HV 0.32 cm/yr

**Miami 26°**  
Winter 10.6 hr  
Summer 13.5 hr  
 $\Delta$ HV 0.42 cm/yr
